# Supplementary material for: Polyacrylonitrile/graphene composite as a precursor to a sulfur-based cathode material for high-rate rechargeable Li–S batteries
Source: Royal Society of Chemistry journal article supplement (doi:10.1039/c2ee03495f), 2012-01-01
Supplement: c2ee03495f.pdf [file c2ee03495f.pdf]

## Electronic Supplementary Information for

# Polyacrylonitrile/Graphene composite as a precursor of sulfur-based cathode material for high-rate rechargeable Li-S batteries

Lichao Yin, Jiulin Wang\*, Fengjiao Lin, Jun Yang\* and Yanna Nuli<sup>a</sup>

<sup>a</sup>*School of Chemistry and Chemical Engineering, Shanghai Jiao Tong University, Shanghai, P. R. China. Fax: (+86)-21-54747667; Tel: (+86)-21-54747667; E-mail: wangjiulin@sjtu.edu.cn, yangj723@sjtu.edu.cn*

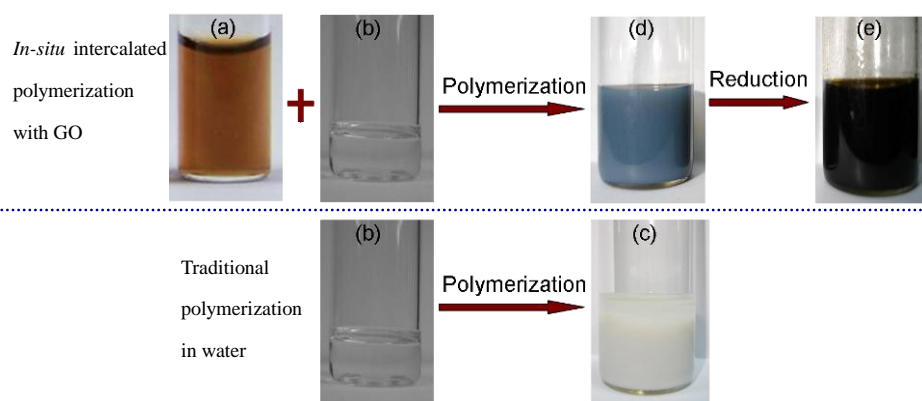

**Fig. S1.** Photographs of aqueous dispersions of GO (a), AN (b), PAN (c), PAN/GO (b) and PAN/GNS (e).

**Table S1.** GO or GNS content in the products:

| Samples                 | GO or GNS content in ca. wt% |    |   |
|-------------------------|------------------------------|----|---|
| PAN/GO <sup>a</sup>     | 20                           | 10 | 5 |
| PAN/GNS <sup>b</sup>    | 16                           | 8  | 4 |
| pPAN-S/GNS <sup>c</sup> | 8                            | 4  | 2 |

<sup>a</sup>As-prepared PAN/GO

<sup>b</sup>After reduction (GNS contents are less than these of GO due to the loss of functional groups in the process of reduction.)

<sup>c</sup>After thermal treatment with S (GNS contents decreased due to the S was embedded in composite after thermal treatment.)

**Table S2.** Component distributions of the final products in ca. wt%:

| Samples       | S  | pPAN | GNS |
|---------------|----|------|-----|
| pPAN-S        | 47 | 53   | 0   |
| pPAN-S/GNS 2% |    | 51   | 2   |
| pPAN-S/GNS 4% |    | 49   | 4   |
| pPAN-S/GNS 8% |    | 45   | 8   |

**Table S3.** BET measurement results of different samples:

| Samples                                                  | PAN   | pPAN-S | PAN/GNS | pPAN/GNS | pPAN-S/GNS |
|----------------------------------------------------------|-------|--------|---------|----------|------------|
| BET total surface area (m <sup>2</sup> g <sup>-1</sup> ) | 19.41 | 10.76  | 37.25   | 35.85    | 25.41      |

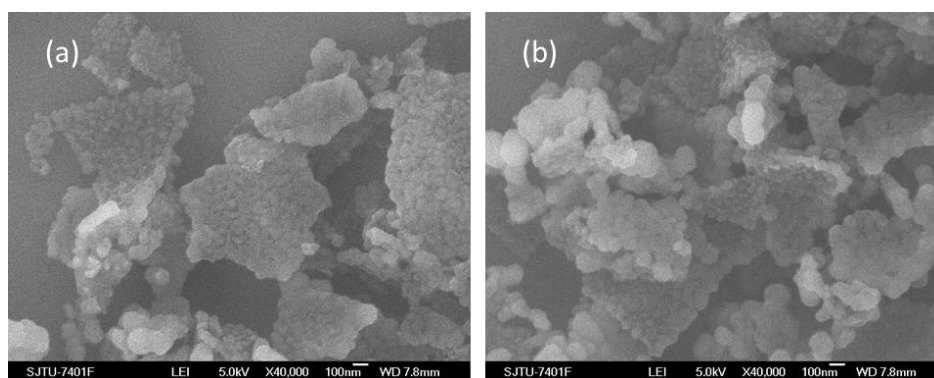

**Fig. S2.** SEM images of PAN/GNS (a) and pPAN/GNS (b).

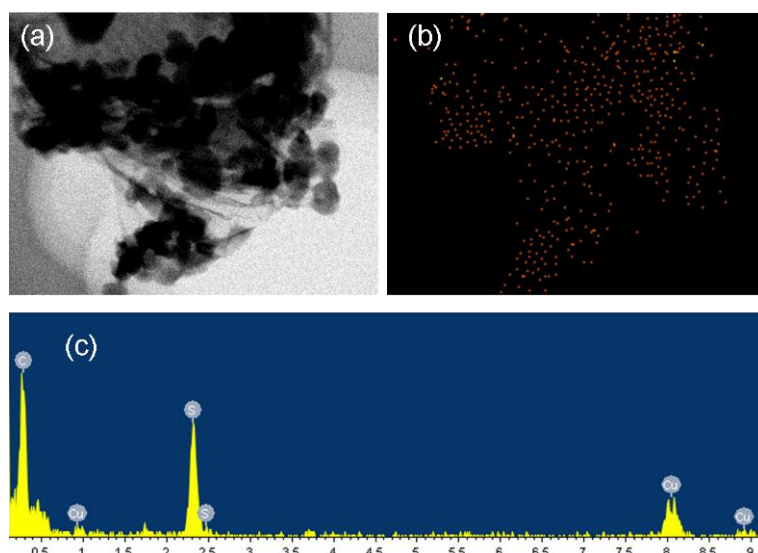

**Fig. S3.** TEM image and elemental mapping of pPAN-S/GNS 4% composite. (a) TEM image of pPAN-S/GNS composite; Elemental mapping of (b) sulfur and (c) EDS spectrum captured for the region shown in (a).

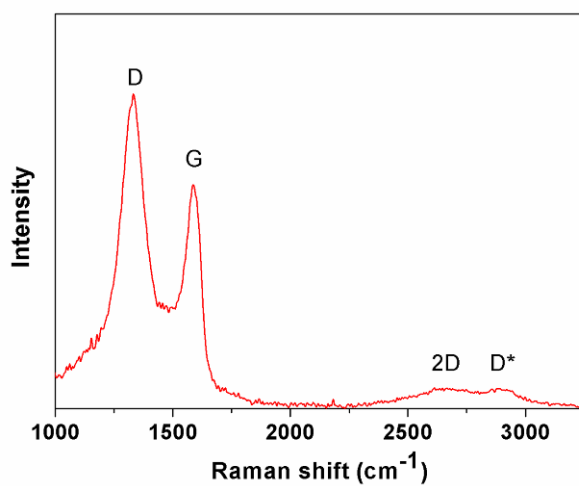

**Fig. S4.** Raman spectrum of GNS.

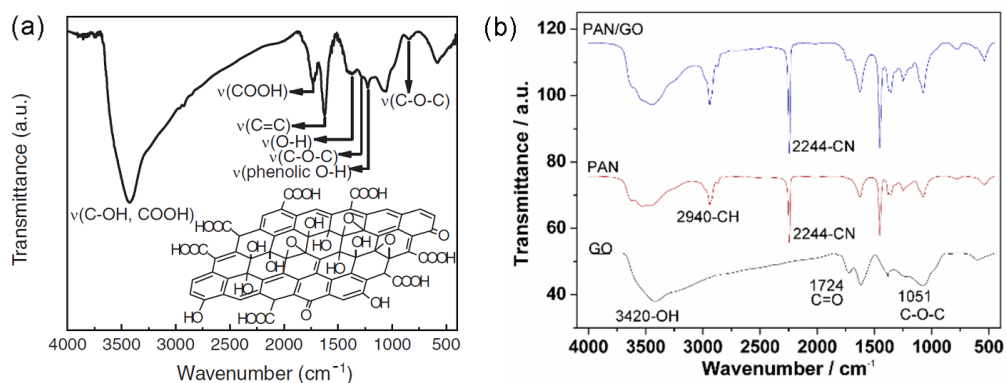

**Fig. S5.** FTIR spectra of GO, PAN and PAN/GO composite.

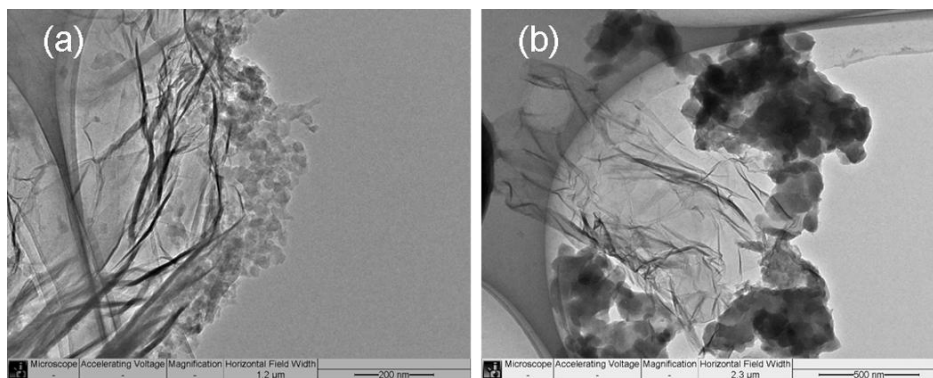

**Fig. S6.** TEM images of PAN/GNS (a) and pPAN-S/GNS (b) composite with GNS content ca. 8%

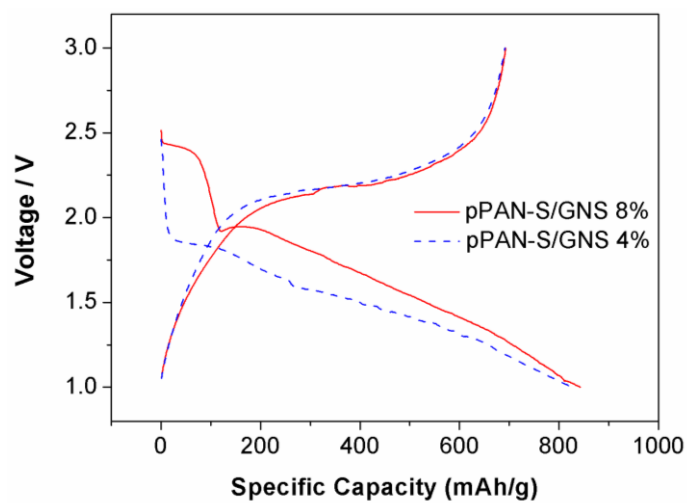

**Fig. S7.** First discharge/charge profiles of pPAN-S/GNS composite electrodes with 8% and 4% GNS.

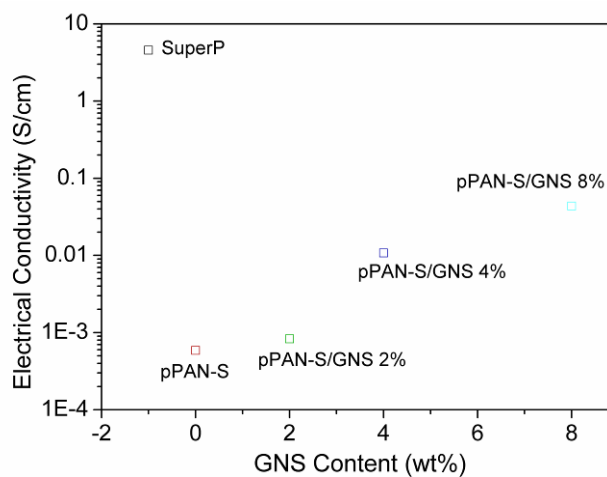

**Fig. S8.** Electronic conductivities of the pPAN-S/GNS composites with different GNS contents.
